# Supplementary material for: An Investigation of Burkholderia pseudomallei Seroprevalence in Market Pigs Slaughtered at Selected Pig Abattoirs in Uganda
Source: MDPI journal article supplement (doi:10.3390/pathogens11111363), 2022-11-16
Supplement: s1 [file s1]

**Table S1: Temporal distribution of *Burkholderia pseudomallei* seroprevalence in market pigs slaughtered at selected pig abattoirs in Uganda**

| Month | Two standard deviation cutoff |                     |                               |                     |                               |                     | Three standard deviation cutoff |                    |                               |                   |       |       | Total |
|-------|-------------------------------|---------------------|-------------------------------|---------------------|-------------------------------|---------------------|---------------------------------|--------------------|-------------------------------|-------------------|-------|-------|-------|
|       | # positive % (95%CI) positive |                     | # positive % (95%CI) positive |                     | # positive % (95%CI) positive |                     | # positive % (95%CI) positive   |                    | # positive % (95%CI) positive |                   | Total |       |       |
|       | A                             | A                   | B                             | B                   | A & B                         | A & B               | A                               | A                  | B                             | B                 |       | A & B |       |
| Jan   | 2                             | 2.00% (0.1-7.4%)    | 2                             | 2.00% (0.1-7.4%)    | 2                             | 2.00% (0.1-7.4%)    | 0                               | 0.00%              | 0                             | 0.00%             | 0     | 0.00% | 100   |
| Feb   | 0                             | 0.00%               | 1                             | 0.93% (0-5.6%)      | 0                             | 0.00%               | 0                               | 0.00%              | 0                             | 0.00%             | 0     | 0.00% | 108   |
| Mar   | 1                             | 0.98% (0-5.9%)      | 2                             | 1.96% (0.1-7.3%)    | 0                             | 0.00%               | 0                               | 0.00%              | 1                             | 0.98% (0-5.9%)    | 0     | 0.00% | 102   |
| Apr   | 1                             | 4.00% (0-21.1%)     | 2                             | 8.00% (1.1-26.1)    | 0                             | 0.00%               | 0                               | 0.00%              | 0                             | 0.00%             | 0     | 0.00% | 25    |
| May   | 0                             | 0.00%               | 1                             | 4.00% (0-21.1%)     | 0                             | 0.00%               | 0                               | 0.00%              | 0                             | 0.00%             | 0     | 0.00% | 25    |
| Jun   | 0                             | 0.00%               | 2                             | 3.08% (0.2-11.2%)   | 0                             | 0.00%               | 0                               | 0.00%              | 0                             | 0.00%             | 0     | 0.00% | 65    |
| Jul   | 0                             | 0.00%               | 2                             | 2.13% (0.1-7.9%)    | 0                             | 0.00%               | 0                               | 0.00%              | 1                             | 1.06% (0-6.4%)    | 0     | 0.00% | 94    |
| Aug   | 0                             | 0.00%               | 0                             | 0.00%               | 0                             | 0.00%               | 0                               | 0.00%              | 0                             | 0.00%             | 0     | 0.00% | 104   |
| Sep   | 1                             | 0.95% (0-5.7%)      | 3                             | 2.86% (0.6-8.4%)    | 0                             | 0.00%               | 0                               | 0.00%              | 0                             | 0.00%             | 0     | 0.00% | 105   |
| Oct   | 19                            | 18.10% (11.8-26.6%) | 20                            | 19.05% (12.6-27.7%) | 10                            | 9.52% (5.1-16.8%)   | 4                               | 3.81% (1.2-9.7%)   | 6                             | 5.71% (2.4-12.2%) | 0     | 0.00% | 105   |
| Nov   | 23                            | 23.47% (16.1-32.8%) | 34                            | 34.69% (26-44.6%)   | 15                            | 15.31% (9.4-23.8%)  | 4                               | 4.08% (1.3-10.4%)  | 12                            | 12.24% (7-20.3%)  | 0     | 0.00% | 98    |
| Dec   | 24                            | 23.08% (16-32.1%)   | 24                            | 23.08% (16-32.1%)   | 17                            | 16.35% (10.4-24.7%) | 12                              | 11.54% (6.6-19.2%) | 8                             | 7.69% (3.7-14.7%) | 0     | 0.00% | 104   |

# = number.
